# Supplementary material
Source: PubMed Central journal article supplement (PMC7136923)
Supplement: ajcr0010-0856-f8.pdf [file ajcr0010-0856-f8.pdf]

PLK1 in neurofibromatosis tumors

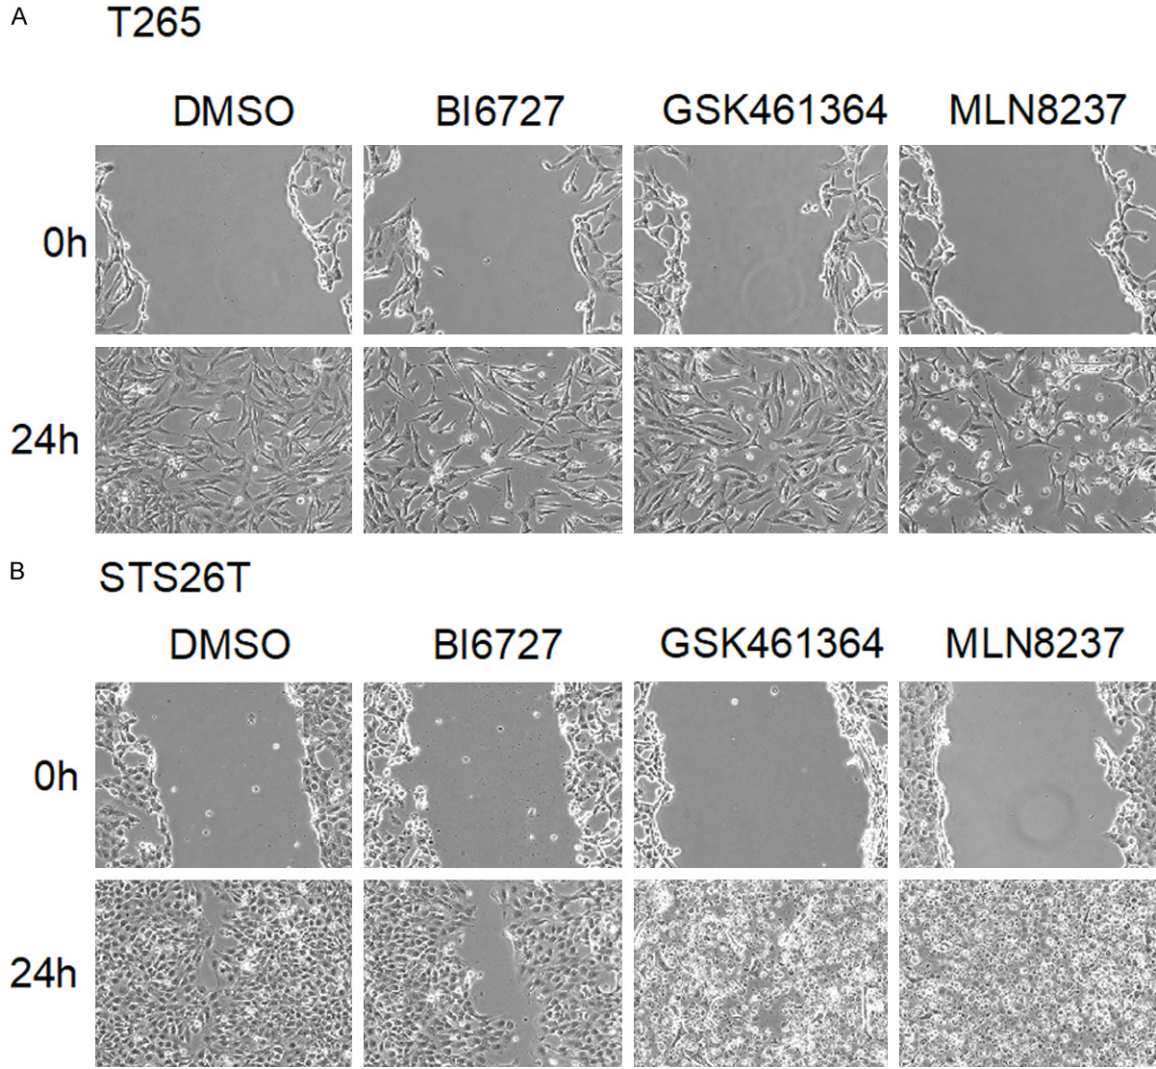

**Figure S1.** Wound healing migration assay. A scratch test wound healing assay was performed on MPNST cells treated as indicated.

PLK1 in neurofibromatosis tumors

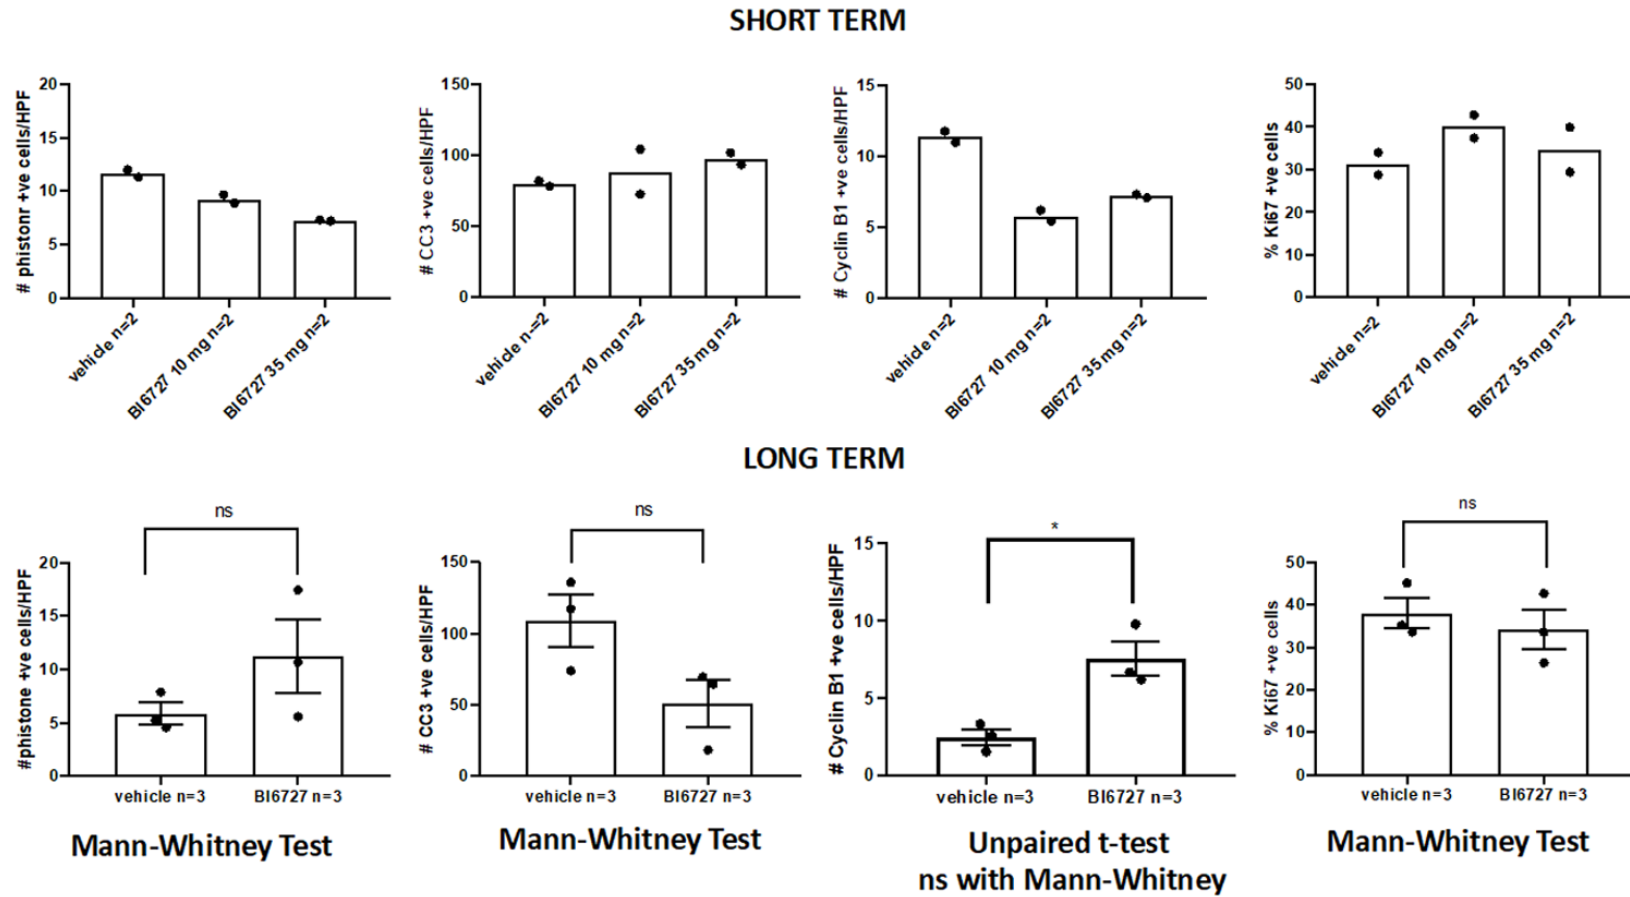

**Figure S2.** Quantification of immunostaining. Cleaved caspase 3, pHistone 3, CyclinB1 were counted on 9 pictures at 40X (HPF) from each animal sample (3 sections/sample and 3 fields/section). The immunopositive cells were counted and averaged over 9 fields. For Ki67 the total cells and the % positive were calculated from 9 pictures). The differences were not significant by Mann-Whitney analysis.
